# Supplementary material for: Reaction mechanisms of aqueous monoethanolamine with carbon dioxide: a combined quantum chemical and molecular dynamics study
Source: Royal Society of Chemistry journal article supplement (doi:10.1039/c4cp04518a), 2014-11-04
Supplement: c4cp04518a1.pdf [file c4cp04518a1.pdf]

## Supporting Information

### Reaction Mechanisms of Aqueous Monoethanolamine with Carbon Dioxide: A Combined Quantum Chemical and Molecular Dynamics Study

Gyeong S. Hwang<sup>1,2,\*</sup>, Haley M. Stowe<sup>2</sup>, Eunsu Paek<sup>1</sup>, and Dhivya Manogaran<sup>3</sup>

<sup>1</sup>Department of Chemical Engineering, <sup>2</sup>Materials Science and Engineering Program, and

<sup>3</sup>Departments of Chemistry and Biochemistry, University of Texas at Austin, Austin, Texas  
78712, United States

\*Author to whom correspondence should be addressed: email: [gshwang@che.utexas.edu](mailto:gshwang@che.utexas.edu)

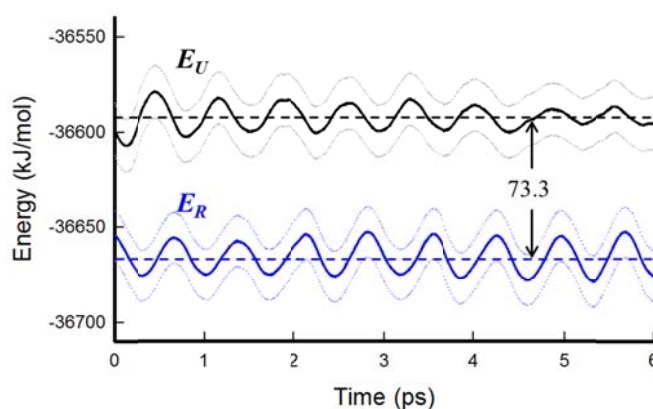

**Figure S1.** Total energy variations from AIMD simulations for the unreacted ( $E_U$ ) and reacted ( $E_R$ ) systems consisting of (2 MEA, 1 CO<sub>2</sub>, 16 H<sub>2</sub>O) and (1 MEACOO<sup>-</sup>, 1 MEAH<sup>+</sup>, 16 H<sub>2</sub>O), respectively, as discussed in Sec. III.A. For each case, the solid line represents the average of five simulations with different initial configurations.

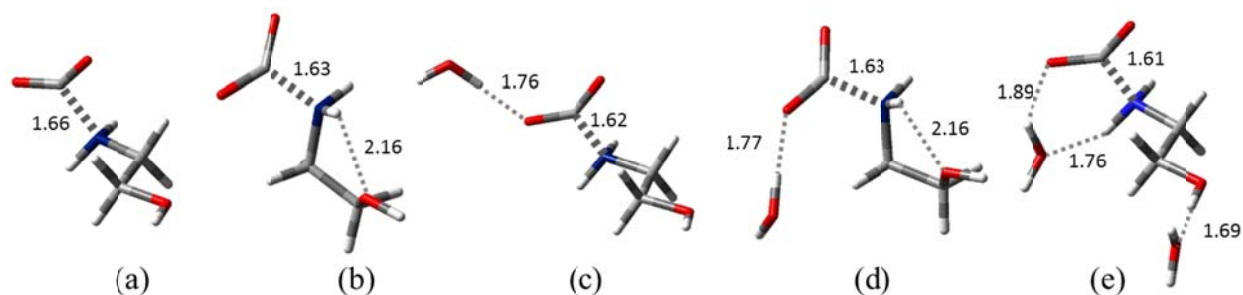

**Figure S2.** Various configurations employed for the calculation of  $E_b(\text{H}^+)$  at different abstraction sites in Fig. 4.

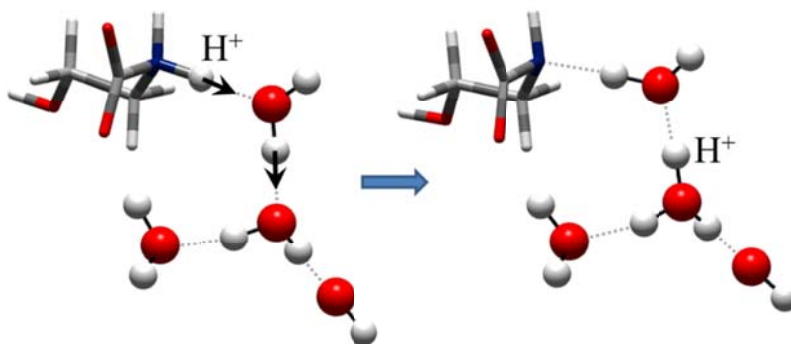

**Figure S3.** Predicted deprotonation process from a zwitterion ( $\text{MEA}^+\text{COO}^-$ ) via a well-connected water network, giving a low barrier of 0.08 eV. The red, blue, and white indicate O, N, and H atoms, respectively.

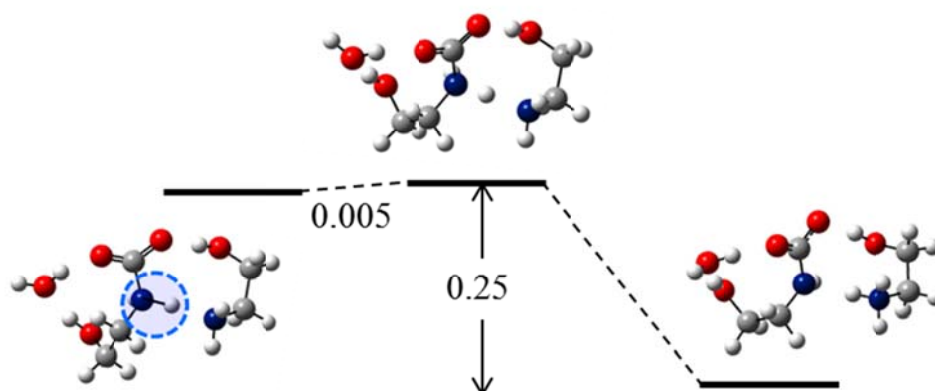

**Figure S4.** Predicted pathway and energetics (in eV) for proton transfer from a zwitterion ( $\text{MEA}^+\text{COO}^-$ ) to a nearby MEA molecule. The white, grey, blue, and red balls represent H, C, N, and O atoms, respectively.

## Force fields employed in this work

The total energy ( $E_{total}$ ) is the sum of the bond ( $E_{bond}$ ), angle ( $E_{angle}$ ), torsion ( $E_{torsion}$ ) and nonbonding energies ( $E_{nonbond}$ ). The nonbonding energy for each pair includes Colulomb interaction and van der Waals interaction in the 12-6 Lennard-Jones form. Bond and angle energies were expressed in the harmonic form. Two different forms were used to express the torsion energies, depending on the dihedral type.

$$E_{total} = E_{bond} + E_{angle} + E_{torsion} + E_{nonbond}$$

$$E_{bond} = \sum_i k_{b,i} (r_i - r_{0,i})^2$$

$$E_{angle} = \sum_i k_{\theta,i} (\theta_i - \theta_{0,i})^2$$

$$E_{torsion} = \sum_i K [1 + \cos(n\phi - d)]$$

or

$$E_{torsion} = \sum_i [C_1 + C_2 \cos(\phi) + C_3 (\cos(\phi))^2 + C_4 (\cos(\phi))^3]$$

$$E_{nonbond} = \sum_i \sum_{j>i} \left\{ \frac{q_i q_j e^2}{r_{ij}} + 4\varepsilon_{ij} \left[ \left( \frac{\sigma_{ij}}{r_{ij}} \right)^{12} - \left( \frac{\sigma_{ij}}{r_{ij}} \right)^6 \right] \right\}$$

Here,  $k_{b,i}$ ,  $k_{\theta,i}$ , represent the bond and angle force constants, respectively.  $K$ ,  $C_1$ ,  $C_2$ ,  $C_3$ , and  $C_4$  are torsion energy coefficients,  $n$  is the periodicity of the torsion,  $d$  is the phase offset, and  $\phi$  is the dihedral angle.  $r_{0,i}$  and  $\theta_{0,i}$  are the bond distance and bond angle at equilibrium, respectively. For  $E_{bond}$ ,  $q_i$  is the partial atomic charge,  $r_{ij}$  is the distance between atoms  $i$  and  $j$ ,  $\varepsilon_{ij}$  and  $\sigma_{ij}$  are the Lennard-Jones parameters which refers to the depth of the potential well and the distance where the potential is zero, respectively. The Coulomb and L-J energies were calculated between atoms separated by three or more bonds. Although most force fields scale the 1-4 L-J and Coulomb energies, in this simulation, they were unscaled as recommended by a previous study to prevent overestimation of intramolecular hydrogen bonding in the amine species.<sup>1</sup> The Lorentz-Berthelot combination rule was applied for unlike atom pairs where  $\varepsilon_{ij} = \sqrt{\varepsilon_i \varepsilon_j}$  and  $\sigma_{ij} = (\sigma_i + \sigma_j)/2$ .

**Table S1.** Nonbonded Force Field Parameters

| Species                           | Atom             | $q_i$  | $\sigma_i$ (Å) | $\epsilon_i$ (kcal/mol) | Reference ( $\sigma_i$ , $\epsilon_i$ ) |
|-----------------------------------|------------------|--------|----------------|-------------------------|-----------------------------------------|
| MEA                               | H <sub>N</sub>   | 0.297  | 1.069          | 0.0157                  | 1                                       |
|                                   | N                | -0.739 | 3.25           | 0.170                   |                                         |
|                                   | C <sub>N</sub>   | -0.113 | 3.3996         | 0.1094                  |                                         |
|                                   | C <sub>O</sub>   | -0.007 | 3.3996         | 0.1094                  |                                         |
|                                   | O <sub>H</sub>   | -0.662 | 3.0664         | 0.2104                  |                                         |
|                                   | H <sub>O</sub>   | 0.383  | 0.0            | 0.0                     |                                         |
|                                   | H <sub>C</sub>   | 0.136  | 2.4714         | 0.0157                  |                                         |
| MEACOO <sup>-</sup>               | H <sub>N</sub>   | 0.294  | 1.069          | 0.0157                  | 1                                       |
|                                   | N                | -0.676 | 3.250          | 0.1700                  |                                         |
|                                   | C <sub>N</sub>   | -0.069 | 3.3996         | 0.1094                  |                                         |
|                                   | C <sub>O</sub>   | 0.019  | 3.3996         | 0.1094                  |                                         |
|                                   | O <sub>H</sub>   | -0.663 | 3.0664         | 0.2104                  |                                         |
|                                   | H <sub>O</sub>   | 0.379  | 0.0            | 0.0                     |                                         |
|                                   | H <sub>C</sub>   | 0.131  | 2.4714         | 0.0157                  |                                         |
|                                   | C <sub>COO</sub> | 0.534  | 3.3996         | 0.0860                  | 2                                       |
|                                   | O <sub>COO</sub> | -0.671 | 2.9599         | 0.2100                  |                                         |
| MEAH <sup>+</sup>                 | H <sub>N</sub>   | 0.438  | 1.069          | 0.0157                  | 1                                       |
|                                   | N                | -0.719 | 3.340          | 0.1700                  | 2                                       |
|                                   | C <sub>N</sub>   | -0.141 | 3.3996         | 0.1094                  | 1                                       |
|                                   | C <sub>O</sub>   | -0.020 | 3.3996         | 0.1094                  |                                         |
|                                   | O <sub>H</sub>   | -0.641 | 3.0664         | 0.2104                  |                                         |
|                                   | H <sub>O</sub>   | 0.395  | 0.0            | 0.0                     |                                         |
|                                   | H <sub>C</sub>   | 0.203  | 2.4714         | 0.0157                  |                                         |
| MEA <sup>+</sup> COO <sup>-</sup> | H <sub>N</sub>   | 0.390  | 1.069          | 0.0157                  | 1                                       |
|                                   | N <sub>H</sub>   | -0.706 | 3.34           | 0.1700                  | 2                                       |
|                                   | C <sub>N</sub>   | -0.098 | 3.3996         | 0.1094                  | 1                                       |
|                                   | C <sub>O</sub>   | -0.027 | 3.3996         | 0.1094                  |                                         |
|                                   | O <sub>H</sub>   | -0.649 | 3.0664         | 0.2104                  |                                         |
|                                   | H <sub>O</sub>   | 0.393  | 0.0            | 0.0                     |                                         |
|                                   | H <sub>C</sub>   | 0.177  | 2.4714         | 0.0157                  |                                         |
|                                   | C <sub>COO</sub> | 0.587  | 3.3996         | 0.0860                  | 2                                       |
|                                   | O <sub>COO</sub> | -0.494 | 2.9599         | 0.2100                  |                                         |

**Table S2.** Bond Parameters

| Species                                                                              | Bond Type                           | $k_b$ (kcal/mol/ Å <sup>2</sup> ) | $r_0$ (Å) | Reference |
|--------------------------------------------------------------------------------------|-------------------------------------|-----------------------------------|-----------|-----------|
| MEA<br>MEACOO <sup>-</sup><br>MEAH <sup>+</sup><br>MEA <sup>+</sup> COO <sup>-</sup> | N - C <sub>N</sub>                  | 320.6                             | 1.470     | 1         |
|                                                                                      | C <sub>N</sub> - C <sub>O</sub>     | 303.1                             | 1.535     |           |
|                                                                                      | N - H <sub>N</sub>                  | 394.1                             | 1.018     |           |
|                                                                                      | C <sub>O</sub> - O <sub>H</sub>     | 314.1                             | 1.426     |           |
|                                                                                      | O <sub>H</sub> - H <sub>O</sub>     | 369.6                             | 0.974     |           |
|                                                                                      | C <sub>N/O</sub> - H <sub>C</sub>   | 335.9                             | 1.093     |           |
| MEACOO <sup>-</sup><br>MEA <sup>+</sup> COO <sup>-</sup>                             | N - C <sub>COO</sub>                | 490.0                             | 1.335     | 2         |
|                                                                                      | C <sub>COO</sub> - O <sub>COO</sub> | 570.0                             | 1.229     |           |

**Table S3.** Angle Parameters

| Species                                                                              | Angle Type                                             | $k_\theta$ (kcal/mol/rad <sup>2</sup> ) | $\theta_0$ (°) | Reference |
|--------------------------------------------------------------------------------------|--------------------------------------------------------|-----------------------------------------|----------------|-----------|
| MEA                                                                                  | C <sub>N</sub> - N - H <sub>N</sub>                    | 46.0                                    | 116.78         | 1         |
| MEA<br>MEAH <sup>+</sup>                                                             | H <sub>N</sub> - N - H <sub>N</sub>                    | 35.0                                    | 109.5          |           |
| MEA<br>MEAH <sup>+</sup><br>MEACOO <sup>-</sup>                                      | N - C <sub>N</sub> - C <sub>O</sub>                    | 66.2                                    | 110.38         |           |
| MEA<br>MEAH <sup>+</sup><br>MEACOO <sup>-</sup><br>MEA <sup>+</sup> COO <sup>-</sup> | H <sub>C</sub> - C <sub>N/O</sub> - C <sub>N/O</sub>   | 46.4                                    | 110.07         |           |
|                                                                                      | C <sub>N</sub> - C <sub>O</sub> - O <sub>H</sub>       | 67.7                                    | 109.43         |           |
|                                                                                      | C <sub>O</sub> - O <sub>H</sub> - H <sub>O</sub>       | 47.1                                    | 108.16         |           |
|                                                                                      | H <sub>C</sub> - C <sub>N</sub> - N                    | 50.0                                    | 109.5          | 2         |
|                                                                                      | H <sub>C</sub> - C <sub>N/O</sub> - H <sub>C</sub>     | 35.0                                    | 109.5          |           |
|                                                                                      | H <sub>C</sub> - C <sub>O</sub> - O <sub>H</sub>       | 50.0                                    | 109.5          |           |
| MEACOO <sup>-</sup>                                                                  | C <sub>N</sub> - N - H <sub>N</sub>                    | 30.0                                    | 118.04         |           |
| MEACOO <sup>-</sup><br>MEA <sup>+</sup> COO <sup>-</sup>                             | C <sub>N</sub> - N - C <sub>COO</sub>                  | 50.0                                    | 121.9          |           |
|                                                                                      | C <sub>COO</sub> - N - H <sub>N</sub>                  | 30.0                                    | 120.0          |           |
|                                                                                      | N - C <sub>COO</sub> - O <sub>COO</sub>                | 80.0                                    | 122.90         |           |
|                                                                                      | O <sub>COO</sub> - C <sub>COO</sub> - O <sub>COO</sub> | 80.0                                    | 126.0          |           |
| MEAH <sup>+</sup><br>MEA <sup>+</sup> COO <sup>-</sup>                               | C <sub>N</sub> - N - H <sub>N</sub>                    | 50.0                                    | 109.5          |           |
| MEA <sup>+</sup> COO <sup>-</sup>                                                    | N - C <sub>N</sub> - C <sub>O</sub>                    | 66.2                                    | 111.2          |           |
|                                                                                      | H <sub>N</sub> - N - H <sub>N</sub>                    | 35.0                                    | 109.5          |           |

**Table S4.** Dihedral Parameters (Multi-Harmonic Form)<sup>1</sup>

| Species                                                  | Dihedral Type                                                     | C <sub>1</sub><br>(kcal/mol) | C <sub>2</sub><br>(kcal/mol) | C <sub>3</sub><br>(kcal/mol) | C <sub>4</sub><br>(kcal/mol) |
|----------------------------------------------------------|-------------------------------------------------------------------|------------------------------|------------------------------|------------------------------|------------------------------|
| MEA                                                      | H <sub>N</sub> - N - C <sub>N</sub> - C <sub>O</sub>              | 0.59                         | -3.75                        | -1.18                        | 3.28                         |
| MEAH <sup>+</sup>                                        | O <sub>H</sub> - C <sub>O</sub> - C <sub>N</sub> - N              | 0.08                         | -4.487                       | -0.16                        | 4.6224                       |
| MEACOO <sup>-</sup><br>MEA <sup>+</sup> COO <sup>-</sup> | C <sub>N</sub> - C <sub>O</sub> - O <sub>H</sub> - H <sub>O</sub> | 0.0                          | -0.22                        | 0.0                          | -0.28                        |

**Table S5.** Dihedral Parameters (Amber Form)<sup>2</sup>

| Species                                                  | Dihedral Type                                                                              | K<br>(kcal/mol) | n | d (°) |
|----------------------------------------------------------|--------------------------------------------------------------------------------------------|-----------------|---|-------|
| MEACOO <sup>-</sup>                                      | H <sub>C</sub> - C <sub>N</sub> - N - H <sub>N</sub> /C <sub>COO</sub>                     | 0.0             | 2 | 0     |
| MEACOO <sup>-</sup><br>MEA <sup>+</sup> COO <sup>-</sup> | H <sub>N</sub> - N - C <sub>COO</sub> - O <sub>COO</sub>                                   | 2.0             | 1 | 0     |
|                                                          | O <sub>COO</sub> - C <sub>COO</sub> - N - C <sub>N</sub>                                   | 2.5             | 2 | 180   |
|                                                          | H <sub>C</sub> - C <sub>O</sub> - O <sub>H</sub> - H <sub>O</sub>                          | 0.167           | 3 | 0     |
|                                                          | C <sub>O</sub> - C <sub>N</sub> - N - C <sub>COO</sub>                                     | 0.530           | 1 | 0     |
|                                                          | H <sub>C</sub> /O <sub>H</sub> /N - C <sub>O</sub> /N - C <sub>N</sub> /O - H <sub>C</sub> | 0.156           | 3 | 0     |
| MEA <sup>+</sup> COO <sup>-</sup>                        | H <sub>C</sub> - C <sub>N</sub> - N - H <sub>N</sub> /C <sub>COO</sub>                     | 0.156           | 3 | 0     |

## REFERENCES

- [1] E. F. da Silva, T. Kuznetsova, B. Kvamme, and K. M. Merz, *J. Phys. Chem. B*, 2007, **111**, 3695–3703.
- [2] W. D. Cornell, P. Cieplak, C. I. Bayly, I. R. Gould, K. M. Merz Jr., D. M. Ferguson, D. C. Spellmeyer, T. Fox, J. W. Caldwell, and P. W. Kolmman, *J. Am. Chem. Soc.*, 1995, **117**, 5179-5197.
